# Supplementary material
Source: MDPI journal article supplement (https://www.mdpi.com/2077-0472/12/3/434)
Supplement: s1 [file s1 › agriculture-1597753-SI.pdf]

Performance of the PLSR models for single adulterant samples using different pretreatment methods based on the full spectral range was shown in Table S1. For urea adulteration, compared with other pretreatments, model based on NOR presented the lowest RMSEP, the 3rd smallest RMSECV, and the 2nd smallest RMSEC. After comprehensive consideration, NOR was the best pretreatment. For melamine adulteration, NOR pretreatment presented similar performance with SNV, but with less number of LVs. Besides, to simplify pretreatment procedure, NOR was also chosen as the optimal pretreatment, the same as urea adulteration condition. For starch adulteration, comparison was clear. Model based on MAS presented the lowest RMSEP, RMSECV, and RMSEC. Hence, MAS was selected as the best pretreatment.

**Table S1** Performance of the PLSR models for single adulterant samples using different pretreatment methods based on the full spectral range.

| Adulterant | Pretreatment method | LVs | Calibration |          | Cross-validation |           | Prediction |          |
|------------|---------------------|-----|-------------|----------|------------------|-----------|------------|----------|
|            |                     |     | $R_c^2$     | RMSEC(%) | $R_{cv}^2$       | RMSECV(%) | $R_p^2$    | RMSEP(%) |
| urea       | NON                 | 7   | 0.995       | 0.255    | 0.992            | 0.320     | 0.990      | 0.350    |
|            | MAS                 | 6   | 0.996       | 0.224    | 0.993            | 0.302     | 0.992      | 0.327    |
|            | NOR                 | 6   | 0.996       | 0.218    | 0.993            | 0.307     | 0.992      | 0.321    |
|            | SNV                 | 5   | 0.995       | 0.257    | 0.993            | 0.309     | 0.991      | 0.341    |
|            | SGS                 | 6   | 0.996       | 0.226    | 0.993            | 0.295     | 0.991      | 0.340    |
|            | SGD1                | 7   | 0.997       | 0.197    | 0.981            | 0.491     | 0.978      | 0.542    |
| melamine   | NON                 | 9   | 1.000       | 0.026    | 1.000            | 0.052     | 1.000      | 0.058    |
|            | MAS                 | 9   | 1.000       | 0.030    | 1.000            | 0.049     | 1.000      | 0.050    |
|            | NOR                 | 6   | 1.000       | 0.028    | 1.000            | 0.040     | 1.000      | 0.042    |
|            | SNV                 | 7   | 1.000       | 0.023    | 1.000            | 0.038     | 1.000      | 0.039    |
|            | SGS                 | 6   | 1.000       | 0.026    | 1.000            | 0.048     | 1.000      | 0.051    |
|            | SGD1                | 8   | 1.000       | 0.029    | 1.000            | 0.117     | 1.000      | 0.119    |
| starch     | NON                 | 7   | 1.000       | 0.110    | 1.000            | 0.159     | 1.000      | 0.188    |
|            | MAS                 | 6   | 1.000       | 0.093    | 1.000            | 0.132     | 1.000      | 0.139    |
|            | NOR                 | 7   | 1.000       | 0.099    | 1.000            | 0.165     | 0.992      | 0.321    |
|            | SNV                 | 5   | 1.000       | 0.102    | 1.000            | 0.133     | 1.000      | 0.153    |
|            | SGS                 | 7   | 1.000       | 0.105    | 1.000            | 0.157     | 1.000      | 0.163    |
|            | SGD1                | 4   | 1.000       | 0.237    | 0.999            | 0.344     | 0.999      | 0.348    |

Figure S1 visualized the process of selecting LVs numbers in full spectral models with the best pretreatments for the three adulterants.

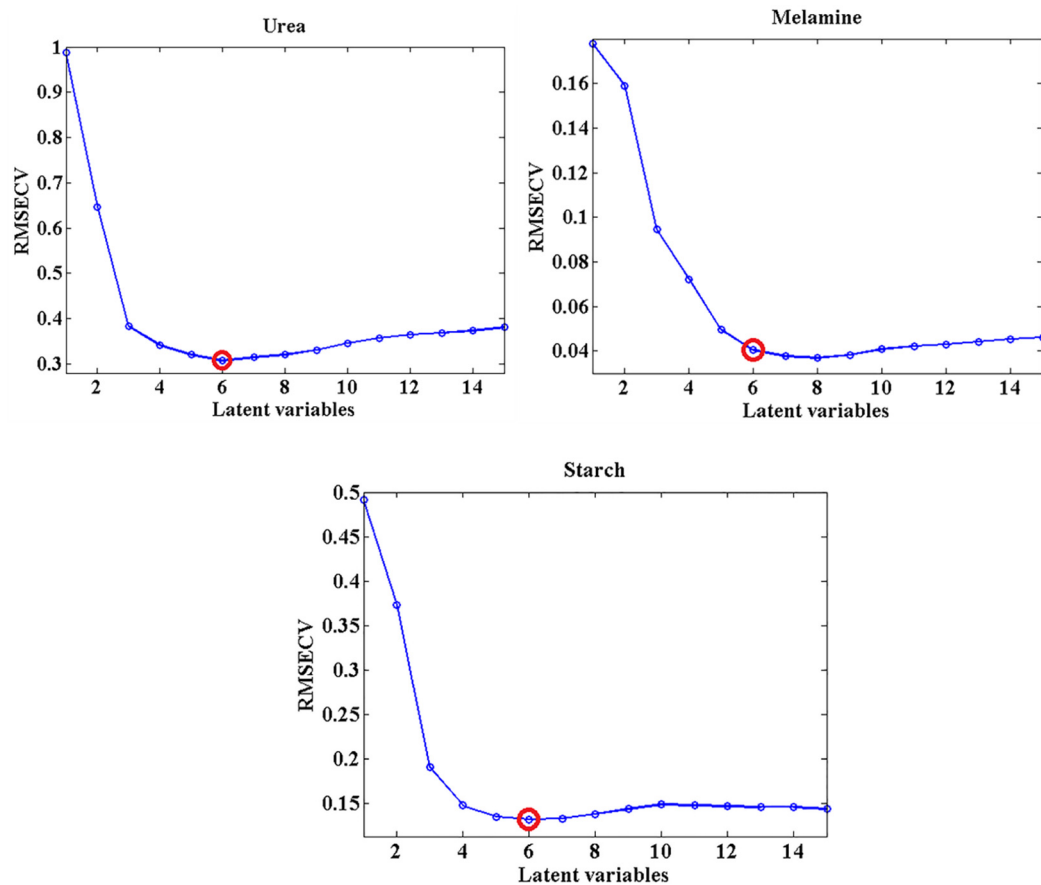

**Figure S1** The optimal number of LVs determination in full spectral models with the best pretreatment for urea (a), melamine (b) and starch (c)
